# Supplementary material
Source: publisher site journal article supplement (https://www.spandidos-publications.com/4781/downloadSupplementary)
Supplement: Supplementary file 1 [file downloadSupplementary]

Table SI. TMB and clinicopathological features of 12 patients with colorectal cancer.

| Case No. | Combination of MMR-protein expression and TIT | MMR-protein expression | Amount of TITs | TMB <sup>a</sup> (number of single nucleotide variant/insertion/deletion variants) <sup>b</sup> | Sex    | Age | Tumor location <sup>c</sup> | Tumor differentiation | Lymph node metastasis | Lymphatic invasion | Venous invasion |
|----------|-----------------------------------------------|------------------------|----------------|-------------------------------------------------------------------------------------------------|--------|-----|-----------------------------|-----------------------|-----------------------|--------------------|-----------------|
| 1        | dMMR/TIT-H                                    | dMMR                   | TIT-H          | 26.3 (894)                                                                                      | Female | 93  | Proximal                    | Well-moderate         | Negative              | Negative           | Positive        |
| 2        | dMMR/TIT-H                                    | dMMR                   | TIT-H          | 22.5 (988)                                                                                      | Female | 86  | Proximal                    | Por-muc               | Negative              | Negative           | Negative        |
| 3        | dMMR/TIT-H                                    | dMMR                   | TIT-H          | 16.7 (962)                                                                                      | Female | 60  | Proximal                    | Well-moderate         | Negative              | Negative           | Negative        |
| 4        | dMMR/TIT-L                                    | dMMR                   | TIT-L          | 9.22 (1000)                                                                                     | Female | 68  | Distal                      | Well-moderate         | Negative              | Negative           | Positive        |
| 5        | dMMR/TIT-L                                    | dMMR                   | TIT-L          | 9.18 (955)                                                                                      | Male   | 54  | Distal                      | Well-moderate         | Positive              | Negative           | Positive        |
| 6        | pMMR/TIT-H                                    | pMMR                   | TIT-H          | 54.7 (895)                                                                                      | Female | 79  | Proximal                    | Por-muc               | Positive              | Positive           | Positive        |
| 7        | pMMR/TIT-H                                    | pMMR                   | TIT-H          | 4.18 (937)                                                                                      | Male   | 75  | Distal                      | Well-moderate         | Negative              | Positive           | Positive        |
| 8        | pMMR/TIT-H                                    | pMMR                   | TIT-H          | 2.51 (958)                                                                                      | Female | 64  | Proximal                    | Well-moderate         | Negative              | Negative           | Negative        |
| 9        | pMMR/TIT-H                                    | pMMR                   | TIT-H          | 2.51 (895)                                                                                      | Female | 58  | Proximal                    | Well-moderate         | Positive              | Negative           | Positive        |
| 10       | pMMR/TIT-L                                    | pMMR                   | TIT-L          | 5.84 (923)                                                                                      | Male   | 81  | Proximal                    | Well-moderate         | Positive              | Positive           | Positive        |
| 11       | pMMR/TIT-L                                    | pMMR                   | TIT-L          | 4.19 (889)                                                                                      | Female | 82  | Distal                      | Well-moderate         | Negative              | Negative           | Negative        |
| 12       | pMMR/TIT-L                                    | pMMR                   | TIT-L          | 3.35 (1003)                                                                                     | Male   | 72  | Distal                      | Well-moderate         | Negative              | Negative           | Positive        |

<sup>a</sup>Patients were additionally divided into two groups based on the TMB (low-TMB group: TMB <10, high-TMB group: TMB ≥10). <sup>b</sup>The number of single nucleotide variants, insertion and deletion. <sup>c</sup>Patients were further divided into two groups based on tumor location (proximal; cecum-to-splenic flexure, distal; and descending colon to the rectum). TMB, tumor mutational burden; TIT-H, high amount of tumor-infiltrating T cells; TIT-L, low amount of tumor-infiltrating T cells; MMR, mismatch repair; dMMR, mismatch repair-deficient; pMMR, mismatch repair-proficient.
